# Supplementary material for: A porcine placental extract prevents steatohepatitis by suppressing activation of macrophages and stellate cells in mice
Source: PubMed Central journal article supplement (PMC5871096; doi:10.18632/oncotarget.24587), 2018-02-27
Supplement: oncotarget-09-15047-s001.pdf [file oncotarget-09-15047-s001.pdf]

## A porcine placental extract prevents steatohepatitis by suppressing activation of macrophages and stellate cells in mice

### SUPPLEMENTARY MATERIALS

**Supplementary Table 1: Mice and rat primer sequences.** See Supplementary\_Table\_1

### Supplementary Table 2: Antibodies used in immunoblotting

| Antibody                        |                        |
|---------------------------------|------------------------|
| anti-phospho-JNK                | Cell signaling (#9255) |
| anti-JNK                        | Cell signaling (#9258) |
| anti-phospho-p38 MAPK           | Cell signaling (#9211) |
| anti-p38 MAPK                   | Cell signaling (#9212) |
| anti-phospho-NF- $\kappa$ B p65 | Cell signaling (#3033) |
| anti-NF- $\kappa$ B p65         | Cell signaling (#3034) |
| anti-phospho-IR $\beta$         | Cell signaling (#3021) |
| anti-IR $\beta$                 | Cell signaling (#3025) |
| anti-phospho-Akt                | Cell signaling (#9271) |
| anti-Akt                        | Cell signaling (#9272) |
| anti-phospho-Erk 1/2            | Cell signaling (#9101) |
| anti-Erk 1/2                    | Cell signaling (#9102) |
| anti-CHOP                       | Cell signaling (#2895) |
| anti-GRP78                      | Santa Cruz (sc13968)   |
| anti-phosphor-Smad3             | Cell signaling (#9520) |
| anti-Smad3                      | Cell signaling (#9523) |
| Monoclonal anti-b-actin         | Sigma-Aldrich (A5441)  |

### Supplementary Table 3: Antibodies used in FACS analysis

| Antibody                                         |             |
|--------------------------------------------------|-------------|
| PerCP-Cyanine5.5-conjugated NK1.1                | eBioscience |
| PerCP-Cyanine5.5-conjugated CD3                  | eBioscience |
| PerCP-Cyanine5.5-conjugated CD19                 | eBioscience |
| PerCP-Cyanine5.5-conjugated TER-119              | eBioscience |
| allophycocyanin (APC)-eFluor 780-conjugated CD45 | eBioscience |
| phycoerythrin (PE)-conjugated CD11c              | eBioscience |
| eFluor 450-conjugated Ly-6G (Gr-1)               | eBioscience |
| PE/Cy7-conjugated F4/80                          | Biolegend   |
| Alexa Fluor 647-conjugated CD206                 | Biolegend   |
| PE-Texas Red-conjugated CD11b                    | Invitrogen  |

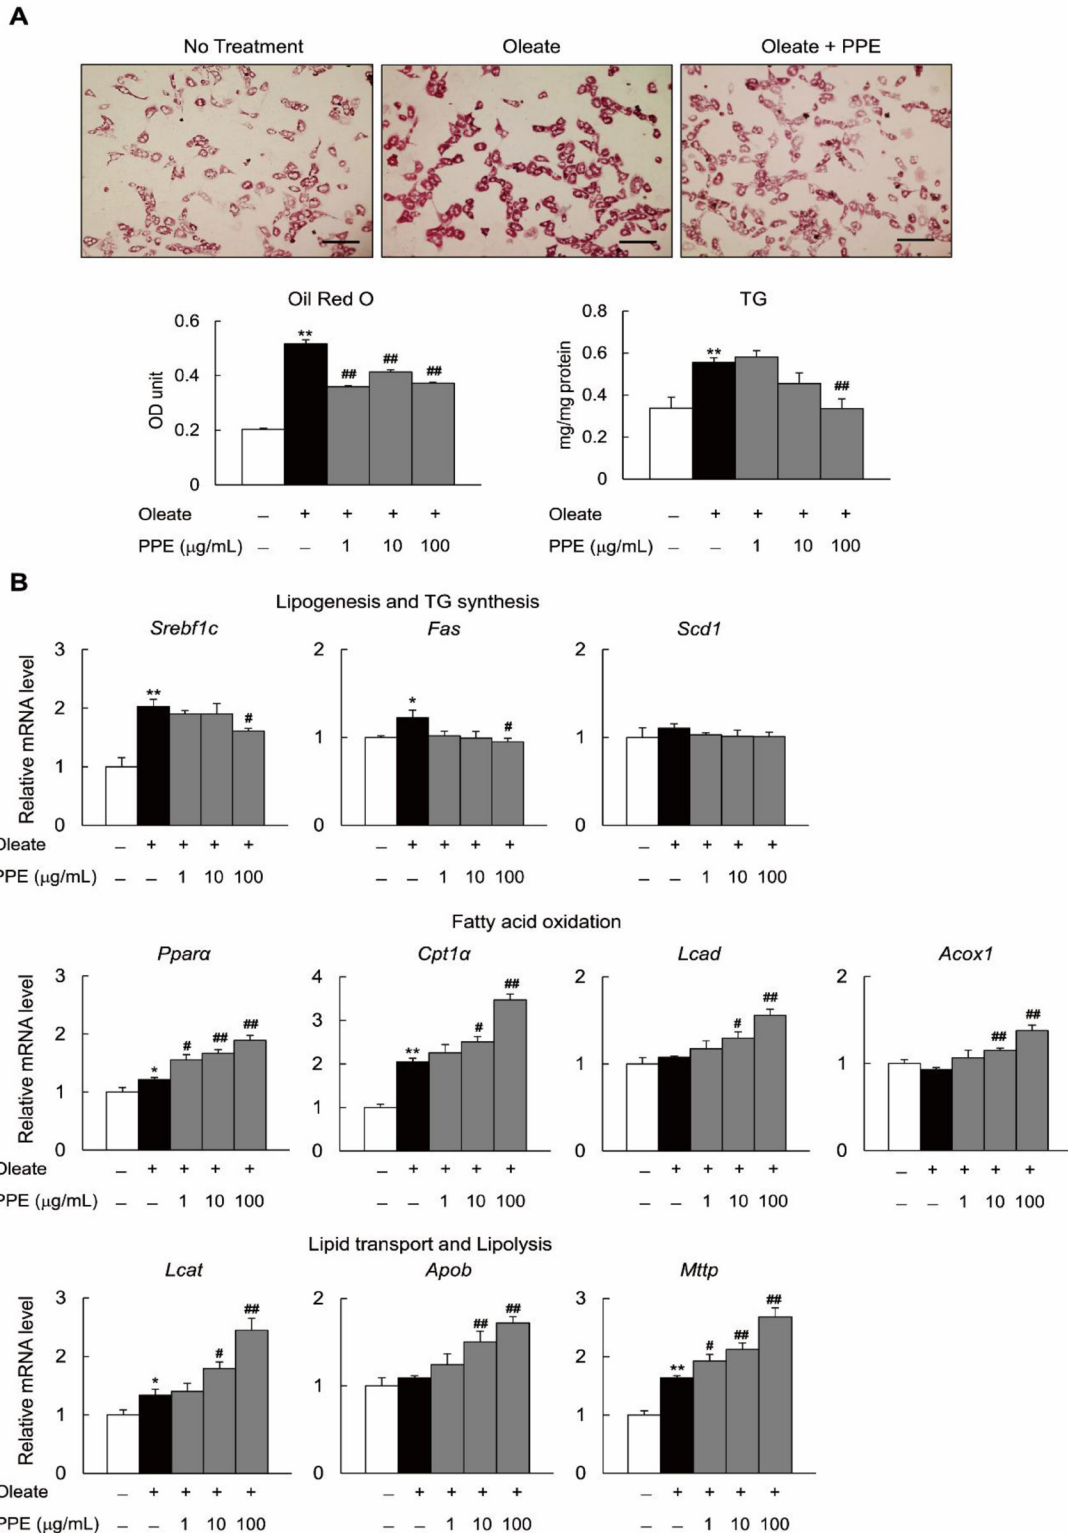

**Supplementary Figure 1: Placenta extracts prevented the fat accumulation in primary hepatocytes.** (A) Oil Red O staining of cultured primary hepatocytes and cellular TG levels. (B) mRNA expression of lipogenesis and lipolysis genes in the primary hepatocytes.  $n = 6$ . \* $P < 0.01$ , vs. no treatment cells. # $P < 0.05$ , ##  $P < 0.01$ , vs. Oleate-treated cells.

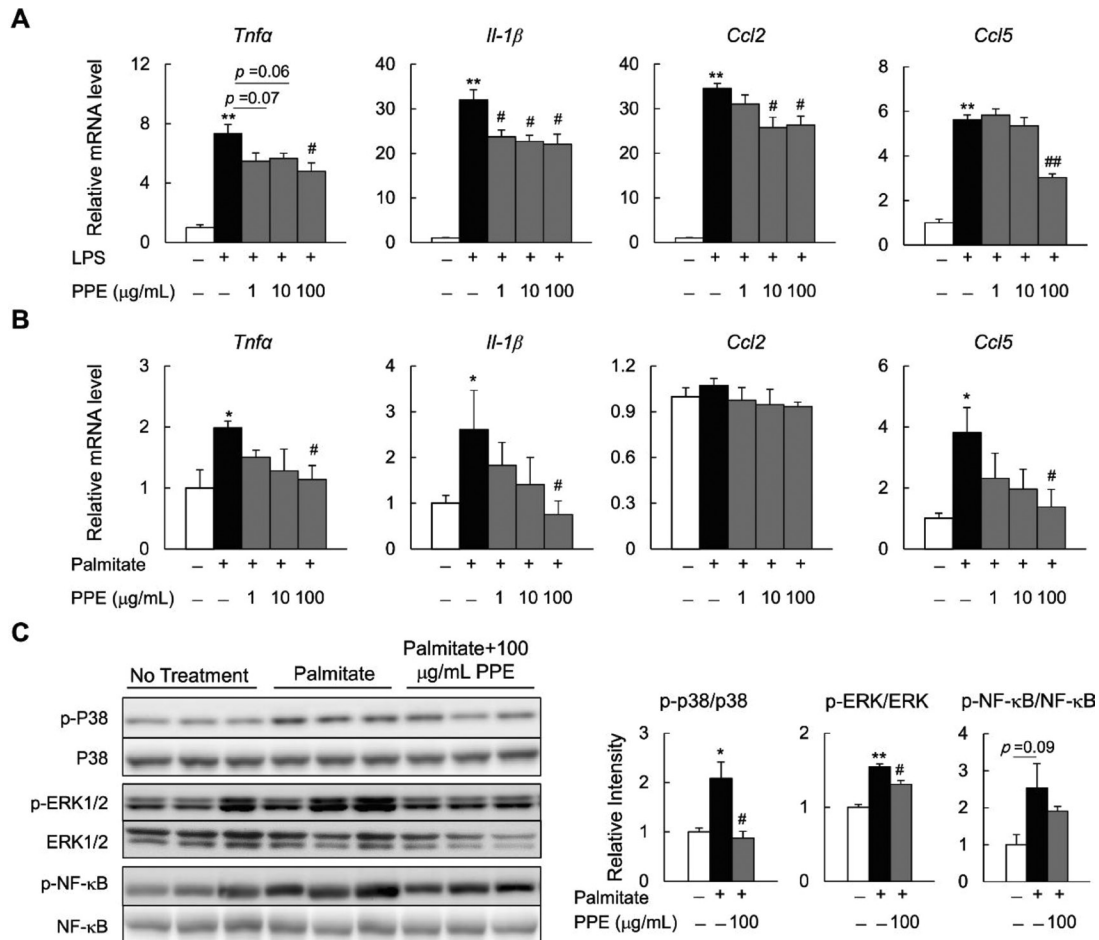

**Supplementary Figure 2: Placenta extracts attenuated LPS- and palmitate-induced inflammation in primary hepatocytes.** (A) mRNA expression of LPS-induced M1 markers in primary hepatocyte. (B) mRNA expression of palmitate-induced M1 markers in primary hepatocyte. (C) Immunoblot of p-p38MAPK, p-ERK, p-NF-κB in palmitate-treated primary hepatocytes.  $n = 6$ . \* $P < 0.05$ , \*\* $P < 0.01$ , vs. no treatment cells. # $P < 0.05$ , ## $P < 0.01$ , vs. LPS- and palmitate-treated cells.
